# Supplementary material
Source: HighWire-hosted journal article supplement (https://www.cmajopen.ca/highwire/filestream/80979/field_highwire_adjunct_files/3/open-2016-0059-4-at.pdf)
Supplement: open-2016-0059-4-at.pdf [file open-2016-0059-4-at.pdf]

**Appendix 4 (as supplied by the authors): Table 4.1 Characteristics of elderly or chronically ill patients hospitalized for acute myocardial infarction, heart failure or chronic obstructive pulmonary disease, Quebec (Canada) 2002-2009**

| Characteristics                                             | Hospitalized for<br>AMI, HF or COPD |                   | Absolute standardized<br>difference<br>(%) |                    |
|-------------------------------------------------------------|-------------------------------------|-------------------|--------------------------------------------|--------------------|
|                                                             | Team-based<br>PC                    | Traditional<br>PC | Before<br>weighting                        | After<br>weighting |
| <b>Admissions, n (%)</b>                                    | 15 740 (17.4)                       | 74 586 (82.6)     | -                                          | -                  |
| <b>Sex, n (%)</b>                                           |                                     |                   |                                            |                    |
| Female                                                      | 7 900 (50.2)                        | 37 444 (50.2)     | 0.0                                        | 1.0                |
| <b>Age (years)</b>                                          |                                     |                   |                                            |                    |
| Mean                                                        | 75.2                                | 75.5              | 3.3                                        | 3.4                |
| <b>Morbidity, n (%)</b>                                     |                                     |                   |                                            |                    |
| Low-moderate                                                | 2 017 (12.8)                        | 9 125 (12.2)      | 1.8                                        | 0.0                |
| High                                                        | 4 552 (28.9)                        | 21 137 (28.3)     | 1.3                                        | 0.1                |
| Very high                                                   | 9 171 (58.3)                        | 44 324 (59.4)     | 2.4                                        | 0.1                |
| <b>Hospitalization cost*</b>                                |                                     |                   |                                            |                    |
| Mean                                                        | \$5,271                             | \$5,207           | 1.9                                        | 0.0                |
| <b>Length of hospital stay<br/>(days)</b>                   |                                     |                   |                                            |                    |
| Mean                                                        | 7.6                                 | 7.9               | 4.9                                        | 0.3                |
| <b>Years since enrolled with<br/>primary care physician</b> |                                     |                   |                                            |                    |
| Mean                                                        | 2.6                                 | 2.3               | 21.3                                       | 4.2                |
| <b>Year of index admission, n<br/>(%)</b>                   |                                     |                   |                                            |                    |
| 2002-2003                                                   | 1 410 (9.0)                         | 11 688 (15.7)     | 20.5                                       | 0.4                |
| 2004                                                        | 2 565 (16.3)                        | 14 454 (19.4)     | 8.1                                        | 4.2                |
| 2005                                                        | 2 816 (17.9)                        | 13 785 (18.5)     | 1.5                                        | 0.2                |
| 2006                                                        | 2 858 (18.2)                        | 14 542 (19.5)     | 3.4                                        | 0.3                |
| 2007                                                        | 2 985 (19.0)                        | 15 177 (20.4)     | 3.5                                        | 2.5                |
| 2008-2009                                                   | 3 106 (19.7)                        | 4 940 (6.6)       | 33.8                                       | 3.0                |
| <b>Material deprivation<br/>quintile, %</b>                 |                                     |                   |                                            |                    |
| Quintile 1 (low deprivation)                                | 1 328(8.4)                          | 8 663 (11.6)      | 10.6                                       | 1.7                |
| Quintile 2                                                  | 2 297 (14.6)                        | 11 394 (15.3)     | 1.9                                        | 0.6                |
| Quintile 3                                                  | 3 260 (20.7)                        | 14 600 (19.6)     | 2.8                                        | 1.2                |
| Quintile 4                                                  | 3 914 (24.9)                        | 16 364 (21.9)     | 6.9                                        | 1.0                |
| Quintile 5 (high)                                           | 3 710 (23.6)                        | 18 008 (24.1)     | 1.3                                        | 4.2                |
| Missing                                                     | 1 231 (7.8)                         | 5 557 (7.5)       | 1.4                                        | 4.1                |
| <b>Geographical region, %</b>                               |                                     |                   |                                            |                    |

Appendix to: Riverin BD, Li P, Naimi AI, et al. Team-based innovations in primary care delivery in Quebec and timely physician follow-up after hospital discharge: a population-based cohort study. *CMAJ Open* 2017. DOI: 10.9778/cmajo.20160059.

Copyright © 2017 The Author(s) or their employer(s).

To receive this resource in an accessible format, please contact us at [cmajgroup@cmaj.ca](mailto:cmajgroup@cmaj.ca).

|                  |              |               |      |     |
|------------------|--------------|---------------|------|-----|
| Urban/university | 3 355 (21.3) | 25 016 (33.5) | 27.7 | 0.7 |
| Suburban         | 6 530 (41.5) | 28 609 (38.4) | 6.4  | 0.2 |
| Intermediate     | 4 829 (30.7) | 16 321 (21.9) | 20.1 | 0.7 |
| Rural            | 992 (6.3)    | 4 315 (5.8)   | 2.2  | 0.8 |
| Missing          | 34 (0.2)     | 325 (0.4)     | 3.9  | 1.6 |

Abbreviations: AMI, acute myocardial infarction; HF, heart failure; COPD, chronic obstructive pulmonary disease; Q, quintile.  
\*Costs in current Canadian dollars are based on resource intensity weights for an admission multiplied by its unit cost per fiscal year.
